# Supplementary material for: Selenium and Vitamin E Concentrations in Miranda Jennies and Foals (Equus asinus) in Northeast Portugal
Source: MDPI journal article supplement (doi:10.3390/ani11061772), 2021-06-14
Supplement: s1 [file s1]

**Supplementary Table S1.** Bayesian inference for One-Way ANOVA to test for differences in the posterior mean for vitamin E (mg/L) and selenium (µg/L) in jennies and foals between sampling locations in Miranda Donkeys.

|                    | Jenny vitamin E (mg/L) |               | Jenny selenium (µg/L) |               | Foal vitamin E (mg/L) |               | Foal selenium (µg/L) |               |
|--------------------|------------------------|---------------|-----------------------|---------------|-----------------------|---------------|----------------------|---------------|
| Groups             | Between Groups         | Within Groups | Between Groups        | Within Groups | Between Groups        | Within Groups | Between Groups       | Within Groups |
| Sum of Squares     | 0.748                  | 84.001        | 8215.446              | 14314.242     | 6.393                 | 343.293       | 1280.261             | 12040.247     |
| df                 | 1                      | 31            | 1                     | 31            | 1                     | 31            | 1                    | 31            |
| Mean Square        | 0.748                  | 2.71          | 8215.446              | 461.75        | 6.393                 | 11.074        | 1280.261             | 388.395       |
| F                  | 0.276                  |               | 17.792                |               | 0.577                 |               | 3.296                |               |
| p-value            | 0.603                  |               | 0.000                 |               | 0.453                 |               | 0.079                |               |
| Bayes Factor       | 0.154                  |               | 128.317               |               | 0.179                 |               | 0.624                |               |
| Categories         | Paradela               | Atenor        | Paradela              | Atenor        | Paradela              | Atenor        | Paradela             | Atenor        |
| Posterior Mode     | 4.651                  | 4.964         | 9.612                 | 42.412        | 4.022                 | 3.107         | 6.43                 | 19.378        |
| Posterior Mean     | 4.651                  | 4.964         | 9.612                 | 42.412        | 4.022                 | 3.107         | 6.43                 | 19.378        |
| Posterior Variance | 0.241                  | 0.138         | 41.133                | 23.505        | 0.986                 | 0.564         | 34.598               | 19.771        |
| 95% CI Lower Bound | 3.682                  | 4.231         | -3.039                | 32.849        | 2.062                 | 1.626         | -5.173               | 10.607        |
| 95% CI Upper Bound | 5.62                   | 5.696         | 22.264                | 51.976        | 5.981                 | 4.588         | 18.033               | 28.149        |

df: degrees of freedom; F: Snedecor's F; CI: Confidence interval.

**Supplementary Table S2.** Bayesian inference for One-Way ANOVA to test for differences in the mean for vitamin E (mg/L) and selenium (µg/L) between genders in Miranda jennies and foals.

|                     | Jenny vitamin E (mg/L) |               | Jenny selenium (µg/L) |               | Foal vitamin E (mg/L) |               | Foal selenium (µg/L) |               |
|---------------------|------------------------|---------------|-----------------------|---------------|-----------------------|---------------|----------------------|---------------|
| Groups              | Between Groups         | Within Groups | Between Groups        | Within Groups | Between Groups        | Within Groups | Between Groups       | Within Groups |
| Sum of Squares      | 1.078                  | 83.672        | 2237.325              | 20292.363     | 86.749                | 262.937       | 1578.133             | 11742.374     |
| df                  | 1                      | 31            | 1                     | 31            | 1                     | 31            | 1                    | 31            |
| Mean Square         | 1.078                  | 2.699         | 2237.325              | 654.592       | 86.749                | 8.482         | 1578.133             | 378.786       |
| F                   | 0.399                  |               | 3.418                 |               | 10.228                |               | 4.166                |               |
| Sig.                | 0.532                  |               | 0.074                 |               | 0.003                 |               | 0.050                |               |
| Bayes Factor        | 0.164                  |               | 0.658                 |               | 10.086                |               | 0.911                |               |
| Categories          | Male                   | Female        | Male                  | Female        | Male                  | Female        | Male                 | Female        |
| Posterior Mean/Mode | 5.233                  | 4.765         | 13.018                | 34.367        | 0                     | 4.204         | 0                    | 17.93         |
| Posterior Variance  | 0.481                  | 0.107         | 116.623               | 25.916        | 1.511                 | 0.336         | 67.485               | 14.997        |
| 95% CI Lower Bound  | 3.865                  | 4.12          | -8.284                | 24.324        | -2.425                | 3.061         | -16.205              | 10.291        |
| 95% CI Upper Bound  | 6.601                  | 5.41          | 34.321                | 44.409        | 2.425                 | 5.347         | 16.205               | 25.569        |

df: degrees of freedom; F: Snedecor's F; CI: Confidence interval.

**Supplementary Table S3.** Bayesian inference for One-Way ANOVA to test for differences in the posterior mean for vitamin E (mg/ L) and selenium (µg/L) across Body Score Condition (BCS) categories in Miranda jennies and foals.

| Factor                 | Variable               | Groups              | Sum of Squares     | df                | Mean Square       | F     | Sig.  | Bayes Factor |
|------------------------|------------------------|---------------------|--------------------|-------------------|-------------------|-------|-------|--------------|
| BCS                    | Jenny vitamin E (mg/L) | Between Groups      | 18.78              | 4                 | 4.695             | 1.993 | 0.123 | 0.072        |
|                        |                        | Within Groups       | 65.97              | 28                | 2.356             |       |       |              |
|                        | Jenny selenium (µg/L)  | Between Groups      | 3944.673           | 4                 | 986.168           | 1.486 | 0.233 | 0.032        |
|                        |                        | Within Groups       | 18585.015          | 28                | 663.751           |       |       |              |
|                        | Foal vitamin E (mg/L)  | Between Groups      | 46.832             | 4                 | 11.708            | 1.082 | 0.384 | 0.016        |
|                        |                        | Within Groups       | 302.855            | 28                | 10.816            |       |       |              |
|                        | Foal selenium (µg/L)   | Between Groups      | 956.508            | 4                 | 239.127           | 0.542 | 0.707 | 0.006        |
|                        |                        | Within Groups       | 12363.999          | 28                | 441.571           |       |       |              |
| Variable               | BCS                    | Posterior Mean/Mode | Posterior Variance | 95%CI Lower Bound | 95%CI Upper Bound |       |       |              |
| Jenny vitamin E (mg/L) | 2                      | 4.855               | 0.317              | 3.743             | 5.967             |       |       |              |
|                        | 2.5                    | 5.897               | 0.282              | 4.849             | 6.945             |       |       |              |
|                        | 3                      | 4.564               | 0.231              | 3.616             | 5.512             |       |       |              |
|                        | 3.5                    | 3.46                | 1.269              | 1.237             | 5.683             |       |       |              |
|                        | 4                      | 3.673               | 0.846              | 1.858             | 5.489             |       |       |              |
| Jenny selenium (µg/L)  | 2                      | 21.381              | 89.351             | 2.723             | 40.04             |       |       |              |
|                        | 2.5                    | 28.457              | 79.423             | 10.865            | 46.048            |       |       |              |
|                        | 3                      | 39.937              | 64.983             | 24.025            | 55.849            |       |       |              |
|                        | 3.5                    | 53.765              | 357.404            | 16.448            | 91.082            |       |       |              |
|                        | 4                      | 10.67               | 238.269            | -19.799           | 41.139            |       |       |              |
| Foal vitamin E (mg/L)  | 2                      | 2.391               | 1.456              | 0.009             | 4.773             |       |       |              |
|                        | 2.5                    | 3.8                 | 1.294              | 1.554             | 6.046             |       |       |              |
|                        | 3                      | 2.835               | 1.059              | 0.804             | 4.867             |       |       |              |
|                        | 3.5                    | 4.56                | 5.824              | -0.204            | 9.324             |       |       |              |
|                        | 4                      | 6.62                | 3.883              | 2.731             | 10.509            |       |       |              |
| Foal selenium (µg/L)   | 2                      | 15.383              | 59.442             | 0.164             | 30.601            |       |       |              |
|                        | 2.5                    | 22.552              | 52.838             | 8.204             | 36.9              |       |       |              |
|                        | 3                      | 10.249              | 43.231             | -2.729            | 23.227            |       |       |              |
|                        | 3.5                    | 6.54                | 237.769            | -23.897           | 36.977            |       |       |              |
|                        | 4                      | 10.75               | 158.513            | -14.102           | 35.602            |       |       |              |

df: degrees of freedom; F: Snedecor's F; CI: Confidence interval.

**Supplementary Table S4.** Bayesian inference for Pearson's linear correlation between age of jennies' levels of selenium ( $\mu\text{g/L}$ ) and vitamin E ( $\text{mg/L}$ ) in Miranda jennies and foals.

| Parameter          | Jenny vitamin E ( $\text{mg/L}$ ) | Jenny selenium ( $\mu\text{g/L}$ ) | Foal vitamin E ( $\text{mg/L}$ ) | Foal selenium ( $\mu\text{g/L}$ ) |
|--------------------|-----------------------------------|------------------------------------|----------------------------------|-----------------------------------|
| Mode               | -0.261                            | 0.189                              | 0.375                            | 0.330                             |
| Mean               | -0.240                            | 0.174                              | 0.346                            | 0.304                             |
| Variance           | 0.025                             | 0.026                              | 0.022                            | 0.023                             |
| 95% CI Lower Bound | -0.542                            | -0.144                             | 0.052                            | 0.001                             |
| 95% CI Upper Bound | 0.070                             | 0.484                              | 0.624                            | 0.592                             |

CI: Confidence interval.

**Supplementary Table S5.** Bayesian inference for One-Way ANOVA to test for differences in the posterior mean for vitamin E (mg/L) and selenium (µg/L) and across diet categories in Miranda jennies and foals.

| Factor                 | Variable                       | Groups              | Sum of Squares     | df                 | Mean Square        | F      | Sig.  | Bayes Factor |
|------------------------|--------------------------------|---------------------|--------------------|--------------------|--------------------|--------|-------|--------------|
| Diet                   | Jenny vitamin E (mg/L)         | Between Groups      | 11.874             | 2.000              | 5.937              | 2.444  | 0.104 | 0.259        |
|                        |                                | Within Groups       | 72.875             | 30.000             | 2.429              |        |       |              |
|                        | Jenny selenium (µg/L)          | Between Groups      | 7560.248           | 2.000              | 3780.124           | 7.576  | 0.002 | 11.512       |
|                        |                                | Within Groups       | 14969.440          | 30.000             | 498.981            |        |       |              |
|                        | Foal vitamin E (mg/L)          | Between Groups      | 178.647            | 2.000              | 89.323             | 15.667 | 0.000 | 1024.893     |
|                        |                                | Within Groups       | 171.039            | 30.000             | 5.701              |        |       |              |
|                        | Foal selenium (µg/L)           | Between Groups      | 3111.042           | 2.000              | 1555.521           | 4.571  | 0.019 | 1.410        |
|                        |                                | Within Groups       | 10209.465          | 30.000             | 340.316            |        |       |              |
| Variable               | Forrage                        | Posterior Mean/Mode | Posterior Variance | 95% CI Lower Bound | 95% CI Upper Bound |        |       |              |
| Jenny vitamin E (mg/L) | Oat (straw with grain)         | 4.336               | 0.137              | 3.606              | 5.066              |        |       |              |
|                        | Oat (straw with grain) and hay | 5.473               | 0.651              | 3.881              | 7.064              |        |       |              |
|                        | Other                          | 5.578               | 0.260              | 4.571              | 6.585              |        |       |              |
| Jenny selenium (µg/L)  | Oat (straw with grain)         | 34.571              | 28.138             | 24.105             | 45.036             |        |       |              |
|                        | Oat (straw with grain) and hay | 59.820              | 133.656            | 37.010             | 82.630             |        |       |              |
|                        | Other                          | 10.989              | 53.462             | -3.437             | 25.415             |        |       |              |
| Foal vitamin E (mg/L)  | Oat (straw with grain)         | 5.221               | 0.322              | 4.102              | 6.339              |        |       |              |
|                        | Oat (straw with grain) and hay | 3.578               | 1.527              | 1.139              | 6.016              |        |       |              |
|                        | Other                          | 0.000               | 0.611              | -1.542             | 1.542              |        |       |              |
| Foal selenium (µg/L)   | Oat (straw with grain)         | 21.511              | 19.191             | 12.867             | 30.154             |        |       |              |
|                        | Oat (straw with grain) and hay | 18.850              | 91.156             | 0.012              | 37.688             |        |       |              |
|                        | Other                          | 0.000               | 36.462             | -11.914            | 11.914             |        |       |              |

df: degrees of freedom; F: Snedecor's F; CI: Confidence interval.

**Supplementary Table S6.** Bayesian inference for One-Way ANOVA to test for differences in the posterior mean for vitamin E (mg/L) and selenium (µg/L) across supplements categories in Miranda jennies and foals.

| Factor                 | Variable                | Groups              | Sum of Squares     | df                 | Mean Square        | F      | Sig.  | Bayes Factor |
|------------------------|-------------------------|---------------------|--------------------|--------------------|--------------------|--------|-------|--------------|
| Supplements            | Jenny vitamin E (mg/ L) | Between Groups      | 2.228              | 2.000              | 1.114              | 0.405  | 0.671 | 0.041        |
|                        |                         | Within Groups       | 82.521             | 30.000             | 2.751              |        |       |              |
|                        | Jenny selenium (µg/L)   | Between Groups      | 15201.376          | 2.000              | 7600.688           | 31.115 | 0.000 | 395935.603   |
|                        |                         | Within Groups       | 7328.311           | 30.000             | 244.277            |        |       |              |
|                        | Foal vitamin E (mg/L)   | Between Groups      | 24.152             | 2.000              | 12.076             | 1.113  | 0.342 | 0.080        |
|                        |                         | Within Groups       | 325.534            | 30.000             | 10.851             |        |       |              |
|                        | Foal selenium (µg/L)    | Between Groups      | 4553.885           | 2.000              | 2276.943           | 7.792  | 0.002 | 13.241       |
|                        |                         | Within Groups       | 8766.622           | 30.000             | 292.221            |        |       |              |
| Variable               | Supplements             | Posterior Mean/Mode | Posterior Variance | 95% CI Lower Bound | 95% CI Upper Bound |        |       |              |
| Jenny vitamin E (mg/L) | No                      | 4.859               | 0.164              | 4.061              | 5.657              |        |       |              |
|                        | Salt blocs ad libitum   | 5.384               | 0.589              | 3.869              | 6.899              |        |       |              |
|                        | Extrafeed               | 4.567               | 0.295              | 3.496              | 5.638              |        |       |              |
| Jenny selenium (µg/L)  | No                      | 10.893              | 14.540             | 3.369              | 18.416             |        |       |              |
|                        | Salt blocs ad libitum   | 53.744              | 52.345             | 39.469             | 68.019             |        |       |              |
|                        | Extrafeed               | 54.122              | 26.173             | 44.028             | 64.216             |        |       |              |
| Foal vitamin E (mg/L)  | No                      | 2.681               | 0.646              | 1.095              | 4.267              |        |       |              |
|                        | Salt blocs ad libitum   | 3.920               | 2.325              | 0.911              | 6.929              |        |       |              |
|                        | Extrafeed               | 4.564               | 1.163              | 2.437              | 6.691              |        |       |              |
| Foal selenium (µg/L)   | No                      | 4.287               | 17.394             | -3.942             | 12.515             |        |       |              |
|                        | Salt blocs ad libitum   | 20.968              | 62.619             | 5.355              | 36.581             |        |       |              |
|                        | Extrafeed               | 30.210              | 31.309             | 19.170             | 41.250             |        |       |              |

df: degrees of freedom; F: Snedecor's F; CI: Confidence interval.

**Supplementary Table S7.** Bayesian inference for One-Way ANOVA to test for differences in the posterior mean vitamin E (mg/ L) and selenium (µg/L) across foal death or conditions categories in Miranda Donkeys.

| Factor                   | Variable                                                                                                | Groups               | Sum of Squares     | df                 | Mean Square        | F      | Sig.  | Bayes Factor |
|--------------------------|---------------------------------------------------------------------------------------------------------|----------------------|--------------------|--------------------|--------------------|--------|-------|--------------|
| Foal death or conditions | Jenny vitamin E (mg/ L)                                                                                 | Between Groups       | 49.439             | 3.000              | 16.480             | 13.535 | 0.001 | 1959.551     |
|                          |                                                                                                         | Within Groups        | 35.310             | 29.000             | 1.218              |        |       |              |
|                          | Jenny selenium (µg/L)                                                                                   | Between Groups       | 4109.974           | 3.000              | 1369.991           | 2.157  | 0.115 | 0.130        |
|                          |                                                                                                         | Within Groups        | 18419.714          | 29.000             | 635.163            |        |       |              |
|                          | Foal vitamin E (mg/ L)                                                                                  | Between Groups       | 61.029             | 3.000              | 20.343             | 2.044  | 0.130 | 0.114        |
|                          |                                                                                                         | Within Groups        | 288.657            | 29.000             | 9.954              |        |       |              |
|                          | Foal selenium (µg/L)                                                                                    | Between Groups       | 1217.408           | 3.000              | 405.803            | 0.972  | 0.419 | 0.029        |
|                          |                                                                                                         | Within Groups        | 12103.099          | 29.000             | 417.348            |        |       |              |
| Variable                 | Foal death or conditions                                                                                | Posterior Mean/Mo de | Posterior Variance | 95% CI Lower Bound | 95% CI Upper Bound |        |       |              |
| Jenny vitamin E (mg/L)   | Does not apply                                                                                          | 4.646                | 0.048              | 4.212              | 5.080              |        |       |              |
|                          | Foal found dead after non assisted parturation                                                          | 5.307                | 0.436              | 4.004              | 6.610              |        |       |              |
|                          | Weak foal but independent. There was a twin mumified foetus in the uterus associated with endometritis. | 3.585                | 0.654              | 1.989              | 5.181              |        |       |              |
|                          | Foal born with carpal flexural deformity                                                                | 11.520               | 1.308              | 9.263              | 13.777             |        |       |              |
| Jenny selenium (µg/L)    | Does not apply                                                                                          | 29.463               | 25.267             | 19.543             | 39.383             |        |       |              |
|                          | Foal found dead after non assisted parturation                                                          | 60.737               | 227.404            | 30.977             | 90.496             |        |       |              |
|                          | Weak foal but independent. There was a twin mumified foetus in the uterus associated with endometritis. | 10.495               | 341.106            | -25.953            | 46.943             |        |       |              |
|                          | Foal born with carpal flexural deformity                                                                | 7.310                | 682.212            | -44.235            | 58.855             |        |       |              |
| Foal vitamin E (mg/L)    | Does not apply                                                                                          | 4.049                | 0.396              | 2.807              | 5.291              |        |       |              |
|                          | Foal found dead after non assisted parturation                                                          | 0.000                | 3.564              | -3.725             | 3.725              |        |       |              |
|                          | Weak foal but independent. There was a twin mumified foetus in the uterus associated with endometritis. | 2.085                | 5.346              | -2.478             | 6.648              |        |       |              |
|                          | Foal born with carpal flexural deformity                                                                | 0.000                | 10.691             | -6.453             | 6.453              |        |       |              |
| Foal selenium (µg/L)     | Does not apply                                                                                          | 16.602               | 9.432              | 25.514             | 6.453              |        |       |              |
|                          | Foal found dead after non assisted parturation                                                          | 0.000                | 149.421            | -24.123            | 24.123             |        |       |              |
|                          | Weak foal but independent. There was a twin mumified foetus in the uterus associated with endometritis. | 6.170                | 224.131            | -23.374            | 35.714             |        |       |              |
|                          | Foal born with carpal flexural deformity                                                                | 0.000                | 448.263            | -41.782            | 41.782             |        |       |              |

df: degrees of freedom; F: Snedecor's F; CI: Confidence interval.

**Supplementary Table S8.** Bayesian inference for One-Way ANOVA to test for differences in the posterior mean for vitamin E (mg/L) and selenium (µg/L) in Miranda jennies and foals across number of previous parturitions in Miranda Donkeys.

| Variable                        |                                 | Groups              | Sum of Squares     | df                 | Mean Square        | F      | Sig.  | Bayes Factor |
|---------------------------------|---------------------------------|---------------------|--------------------|--------------------|--------------------|--------|-------|--------------|
| Number of previous parturitions | Jenny vitamin E (mg/L)          | Between Groups      | 6.099              | 3.000              | 2.033              | 0.750  | 0.531 | 0.021        |
|                                 |                                 | Within Groups       | 78.650             | 29.000             | 2.712              |        |       |              |
|                                 | Jenny selenium (µg/L)           | Between Groups      | 15384.248          | 3.000              | 5128.083           | 20.812 | 0.000 | 93165.797    |
|                                 |                                 | Within Groups       | 7145.439           | 29.000             | 246.394            |        |       |              |
|                                 | Foal vitamin E (mg/L)           | Between Groups      | 27.410             | 3.000              | 9.137              | 0.822  | 0.492 | 0.023        |
|                                 |                                 | Within Groups       | 322.277            | 29.000             | 11.113             |        |       |              |
|                                 | Foal selenium (µg/L)            | Between Groups      | 909.067            | 3.000              | 303.022            | 0.708  | 0.555 | 0.020        |
|                                 |                                 | Within Groups       | 12411.440          | 29.000             | 427.981            |        |       |              |
| Variable                        | Number of previous parturitions | Posterior Mean/Mode | Posterior Variance | 95% CI Lower Bound | 95% CI Upper Bound |        |       |              |
| Jenny vitamin E (mg/L)          | 0                               | 4.843               | 0.146              | 4.090              | 5.596              |        |       |              |
|                                 | 1                               | 5.170               | 0.728              | 3.486              | 6.854              |        |       |              |
|                                 | 2                               | 5.143               | 0.416              | 3.870              | 6.416              |        |       |              |
|                                 | 8                               | 3.255               | 1.456              | 0.873              | 5.637              |        |       |              |
| Jenny selenium (µg/L)           | 0                               | 17.292              | 13.232             | 10.113             | 24.470             |        |       |              |
|                                 | 1                               | 78.960              | 66.161             | 62.908             | 95.012             |        |       |              |
|                                 | 2                               | 46.147              | 37.807             | 34.013             | 58.281             |        |       |              |
|                                 | 8                               | 10.655              | 132.323            | -12.046            | 33.356             |        |       |              |
| Foal vitamin E (mg/L)           | 0                               | 2.897               | 0.597              | 1.372              | 4.422              |        |       |              |
|                                 | 1                               | 5.700               | 2.984              | 2.291              | 9.109              |        |       |              |
|                                 | 2                               | 3.489               | 1.705              | 0.912              | 6.066              |        |       |              |
|                                 | 8                               | 4.170               | 5.968              | -0.651             | 8.991              |        |       |              |
| Foal selenium (µg/L)            | 0                               | 10.833              | 22.984             | 1.372              | 20.294             |        |       |              |
|                                 | 1                               | 22.565              | 114.921            | 1.409              | 43.721             |        |       |              |
|                                 | 2                               | 21.786              | 65.669             | 5.794              | 37.778             |        |       |              |
|                                 | 8                               | 12.340              | 229.841            | -17.578            | 42.258             |        |       |              |

df: degrees of freedom; F: Snedecor's F; CI: Confidence interval.



**Supplementary Table S9.** Bayesian inference for One-Way ANOVA to test for differences in the posterior mean for vitamin E (mg/L) and selenium (µg/L) in jennies and foals across month of breeding in Miranda Donkeys.

| Factor                 | Variable               | Groups              | Sum of Squares     | df                 | Mean Square        | F     | Sig.  | Bayes Factor |
|------------------------|------------------------|---------------------|--------------------|--------------------|--------------------|-------|-------|--------------|
| Month of breeding      | Jenny vitamin E (mg/L) | Between Groups      | 19.903             | 6.000              | 3.317              | 1.330 | 0.280 | 0.009        |
|                        |                        | Within Groups       | 64.846             | 26.000             | 2.494              |       |       |              |
|                        | Jenny selenium (µg/L)  | Between Groups      | 9762.264           | 6.000              | 1627.044           | 3.313 | 0.015 | 0.490        |
|                        |                        | Within Groups       | 12767.423          | 26.000             | 491.055            |       |       |              |
|                        | Foal vitamin E (mg/L)  | Between Groups      | 183.417            | 6.000              | 30.569             | 4.780 | 0.002 | 4.906        |
|                        |                        | Within Groups       | 166.269            | 26.000             | 6.395              |       |       |              |
|                        | Foal selenium (µg/L)   | Between Groups      | 9074.844           | 6.000              | 1512.474           | 9.262 | 0.000 | 882.299      |
|                        |                        | Within Groups       | 4245.663           | 26.000             | 163.295            |       |       |              |
| Variable               | month of breeding      | Posterior Mean/Mode | Posterior Variance | 95% CI Lower Bound | 95% CI Upper Bound |       |       |              |
| Jenny vitamin E (mg/L) | Missing                | 5.996               | 0.386              | 4.769              | 7.223              |       |       |              |
|                        | January                | 4.603               | 0.901              | 2.729              | 6.478              |       |       |              |
|                        | March                  | 3.255               | 1.351              | 0.960              | 5.550              |       |       |              |
|                        | April                  | 4.713               | 0.208              | 3.813              | 5.613              |       |       |              |
|                        | May                    | 5.113               | 0.675              | 3.489              | 6.736              |       |       |              |
|                        | July                   | 3.285               | 1.351              | 0.990              | 5.580              |       |       |              |
|                        | October                | 4.735               | 1.351              | 2.440              | 7.030              |       |       |              |
|                        | Missing                | 12.209              | 75.997             | -5.008             | 29.425             |       |       |              |
| Jenny selenium (µg/L)  | January                | 8.143               | 177.325            | -18.155            | 34.442             |       |       |              |
|                        | March                  | 10.655              | 265.988            | -21.554            | 42.864             |       |       |              |
|                        | April                  | 43.319              | 40.921             | 30.686             | 55.953             |       |       |              |
|                        | May                    | 54.225              | 132.994            | 31.450             | 77                 |       |       |              |
|                        | July                   | 11.860              | 265.988            | -20.349            | 44.069             |       |       |              |
|                        | October                | 35.520              | 265.988            | 3.311              | 67.729             |       |       |              |
|                        | Missing                | 0.000               | 0.990              | -1.965             | 1.965              |       |       |              |
|                        | January                | 0.000               | 2.309              | -3.001             | 3.001              |       |       |              |
| Foal vitamin E (mg/ L) | March                  | 4.170               | 3.464              | 0.494              | 7.846              |       |       |              |
|                        | April                  | 4.651               | 0.533              | 3.209              | 6.092              |       |       |              |
|                        | May                    | 5.670               | 1.732              | 3.071              | 8.269              |       |       |              |
|                        | July                   | 4.090               | 3.464              | 0.414              | 7.766              |       |       |              |
|                        | October                | 6.920               | 3.464              | 3.244              | 10.596             |       |       |              |
|                        | Missing                | 0.000               | 25.272             | -9.928             | 9.928              |       |       |              |
|                        | January                | 0.000               | 58.968             | -15.165            | 15.165             |       |       |              |
|                        | March                  | 12.340              | 88.451             | -6.234             | 30.914             |       |       |              |
| Foal selenium (µg/L)   | April                  | 11.655              | 13.608             | 4.370              | 18.941             |       |       |              |
|                        | May                    | 48.850              | 44.226             | 35.717             | 61.983             |       |       |              |
|                        | July                   | 9.440               | 88.451             | -9.134             | 28.014             |       |       |              |
|                        | October                | 46.810              | 88.451             | 28.236             | 65.384             |       |       |              |

df: degrees of freedom; F: Snedecor's F; CI: Confidence interval.
